# Supplementary material for: Pigmentation and Flavonoid Metabolite Diversity in Immature ‘Fuji’ Apple Fruits in Response to Lights and Methyl Jasmonate
Source: MDPI journal article supplement (doi:10.3390/ijms23031722), 2022-02-02
Supplement: s1 [file s1]

# Supplementary Materials

**Table S1.** The information of primer sequences used in metabolic gene expressions of anthocyanin biosynthesis.

| Name    | Direction      | Sequence                          |
|---------|----------------|-----------------------------------|
| MdCHS   | F <sup>z</sup> | GGA GAC AAC TGG AGA AGG ACT GGA A |
|         | R <sup>y</sup> | CGA CAT TGA TAC TGG TGT CTT CA    |
| MdCHI   | F              | GGG ATA ACC TCG CGG CCA AA        |
|         | R              | GCA TCC ATG CCG GAA GCT ACA A     |
| MdF3H   | F              | TGG AAG CTT GTG AGG ACT GGG GT    |
|         | R              | CTC CTC CGA TGG CAA ATC AAA GA    |
| MdDFR2  | F              | GAT AGG GTT TGA GTT CAA GTA       |
|         | R              | CGG CCG GAA TCG GAA TCA ATC       |
| MdLDOX  | F              | CCA AGT GAA GCG GGT TGT GCT       |
|         | R              | CAA AGC AGG CGG ACA GGA GTA GC    |
| MdFLS   | F              | ACG AGC AAC CGG GAA TCA CAA CTG   |
|         | R              | CCC AGT TGG AGC TGG CCT CAG TA    |
| MdUFGT  | F              | CCA CCG CCC TTC CAA ACA CTC T     |
|         | R              | CAC CCT TAT GTT ACG CGG CAT GT    |
| MdMYB10 | F              | TGC CTG GAC TCG AGA GGA AGA CA    |
|         | R              | CCT GTT TCC CAA AAG CCT GTG AA    |
| MdACS6  | F              | AGT GGA TTA ATT CGC TCT TAT GGT G |
|         | R              | GAA CAT CCT CTG GAG TCA AAG TAG   |
| MdActin | F              | TGA CCG AAT GAG CAA GGA AAT TAC T |
|         | R              | TAC TCA GCT TTG GCA ATC CAC ATC   |

<sup>z</sup> and <sup>y</sup> indicate forward (5' → 3') and reverse (3' → 5'), respectively.

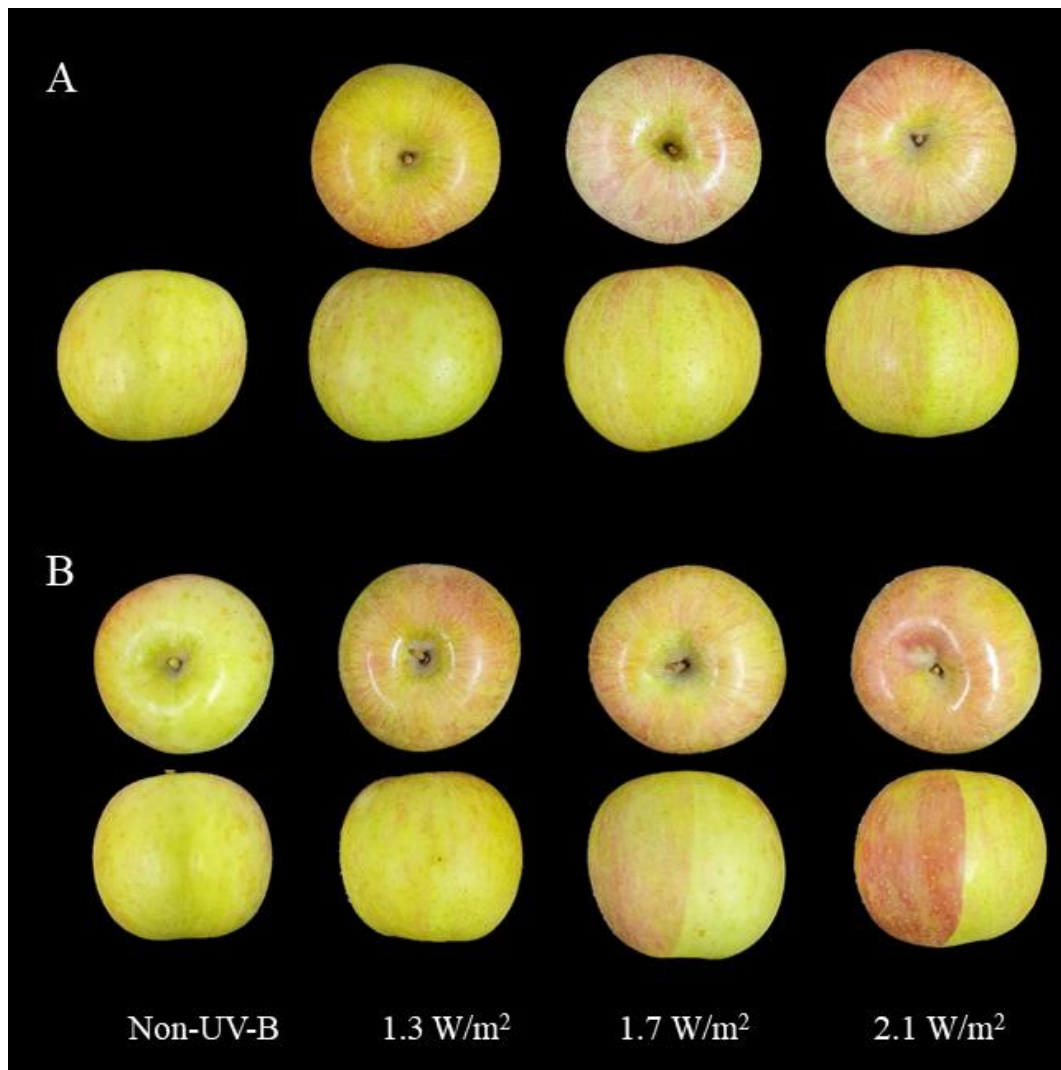

**Figure S1.** Pigmentation of S2 'Fuji' apples by the effects of UV-B intensities either without MeJA (**A**) or with MeJA (**B**) after 3 days of UV-B irradiation. The status of S2 apples were 145 days after full blooming and just showed the initiation of apple pigmentation on the apple trees.
